# Supplementary material for: Replication Stress Response Modifies Sarcomeric Cardiomyopathy Remodeling
Source: PubMed Central journal article supplement — J Am Heart Assoc. 2021 Jul 29;10(15):e021768. doi: 10.1161/JAHA.121.021768 (PMC8475701; doi:10.1161/jaha.121.021768), 2021-07-29
Supplement: JAH3-10-e021768-s001.pdf [file JAH3-10-e021768-s001.pdf]

# **SUPPLEMENTAL MATERIAL**

**Table S1. Oligonucleotide primer sequences used for qRT-PCR**

| <b>Gene</b> | <b>Forward Sequence</b>   | <b>Reverse Sequence</b> |
|-------------|---------------------------|-------------------------|
| p53         | TGTTATGTGCACGTA CTCTCCTC  | GCTCCCAGCTGGAGGTGT      |
| Mdm2        | GGAGATCCATTAGTGAGACAGAAGA | AGACCCAGGCTCGGATCA      |
| Cdkn1a      | GCAGACCAGCCTGACAGATT      | CTGACCCACAGCAGAAGAGG    |
| Gdf15       | CGGATACTCAGTCCAGAGGTG     | GTGCACGCGGTAGGCTTC      |
| Gadd45a     | GCTCAACGTAGACCCCGATA      | CACGGATGAGGGTGAAATG     |
| Rpl32       | CACCAGTCAGACCGATATGTGAAAA | TGTTGTCAATGCCTCTGGGTTT  |

**Table S2. Clinical characteristics of human non-HCM (control) and HCM left ventricular septal tissue samples**

|           | Age (yrs) | Sex | Sarc Mut | Gene   | cDNA        | AA    | IVSd (mm) | LVPWd (mm) | IVSd/LVPWd | EF (%) | LVIDd (mm) |
|-----------|-----------|-----|----------|--------|-------------|-------|-----------|------------|------------|--------|------------|
| Non-HCM 1 | 47        | M   | N        |        |             |       | 9         | 9          | 1          | 73     | 54         |
| Non-HCM 2 | 38        | F   | N        |        |             |       | 10        | 8          | 1.3        | 55     | 39         |
| Non-HCM 3 | 51        | F   | N        |        |             |       | 8         | 8          | 1          | 50     | 37         |
| Non-HCM 4 | 40        | M   | N        |        |             |       | 11        | 11         | 1          | 55     | 50         |
| HCM 1     | 41        | F   | Y        | MYBPC3 | c.3330+2T>G |       | 18        | 8          | 2.3        | 75     | 35         |
| HCM 2     | 24        | F   | Y        | MYBPC3 | G2670A      | W890X | 27        | 7          | 3.9        | 88     | 35         |
| HCM 3     | 28        | M   | Y        | MYBPC3 | c.927-9G>A  |       | 18        | 11         | 1.6        | 75     | 30         |
| HCM 4     | 54        | M   | Y        | MYBPC3 | G1624C      | E542Q | 32        | 14         | 2.3        | 65     | 35         |
| HCM 5     | 27        | M   | Y        | MYH7   | G1988A      | R663H | 33        | 11         | 3.0        | 69     | 42         |
| HCM 6     | 34        | F   | Y        | MYH7   | G2770A      | E924K | 18        | 7          | 2.6        | 65     | 51         |

**Figure S1. Comparison of DNA damage in cardiomyocytes vs non-cardiomyocytes and male vs female in Mybpc3 null mice.**

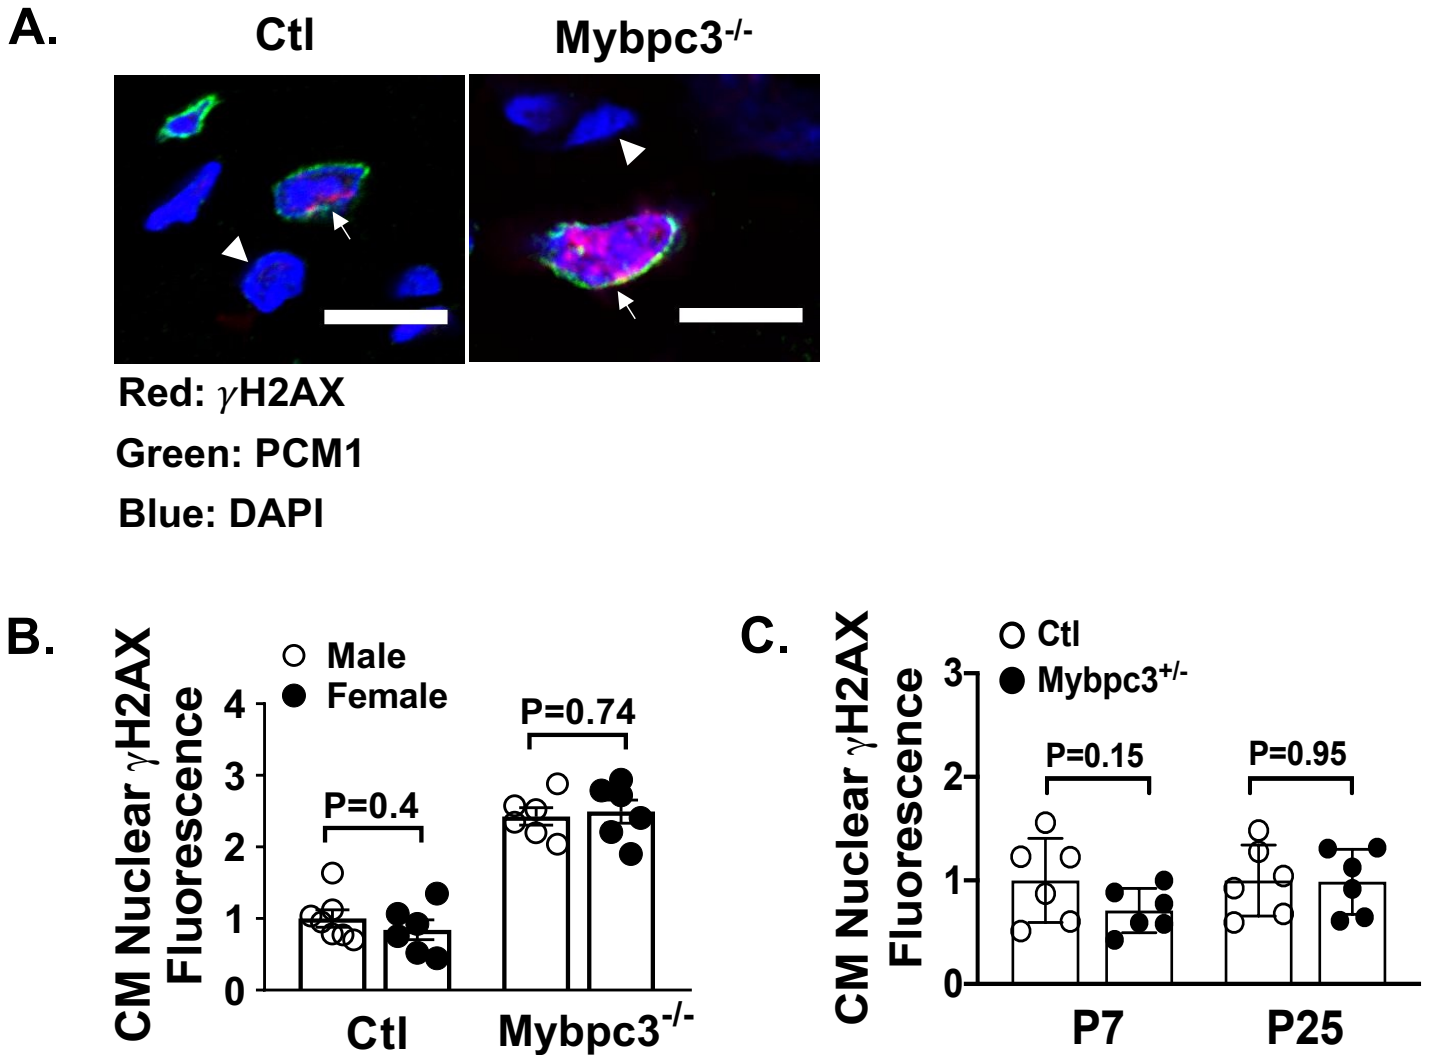

**(A)** Representative immunofluorescence staining of  $\gamma$ H2AX (red) in Ctl and Mybpc3<sup>-/-</sup> myocardial tissue at postnatal day 7 (P7). Cardiomyocyte nuclei (arrow) were differentiated from non-cardiomyocyte nuclei (arrowhead) using PCM1 (pericentriolar material 1) (green) staining. Nuclei labeled with DAPI (blue). Scale bars, 10  $\mu$ m. **(B)** Quantification of  $\gamma$ H2AX fluorescence in cardiomyocyte nuclei in Ctl (n=6-7) and Mybpc3<sup>-/-</sup> (n=6) myocardial tissue from male and female mice at P7. Minimum 50 nuclei/sample. **(C)** Quantification of  $\gamma$ H2AX fluorescence in cardiomyocyte nuclei in Ctl (n=6) and Mybpc3<sup>+/-</sup> (n=6) myocardial tissue at P7 and P25. Minimum 50 nuclei/sample. Results are shown as mean $\pm$ SEM.

Figure S2. Effect of AZD6738 treatment on body weight in control and Mybpc3 null mice.

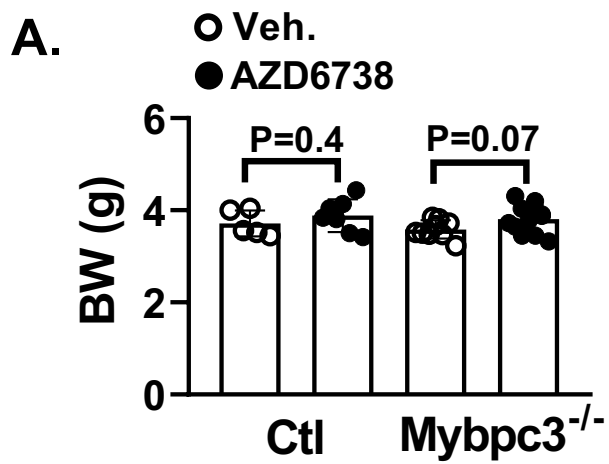

(A) Body weight (BW) in control (Ctl) (n=5-7) and Mybpc3<sup>-/-</sup> (n=9-12) mice either exposed to vehicle (Veh.) or 25 mg/kg/day AZD6738 at postnatal day 7. Results are shown as mean±SEM.

Figure S3. Comparison of echocardiography measurements between *Mybpc3*<sup>-/-</sup> and *Mybpc3*<sup>-/-</sup>/*Myh6Cre*<sup>+/-</sup> mice.

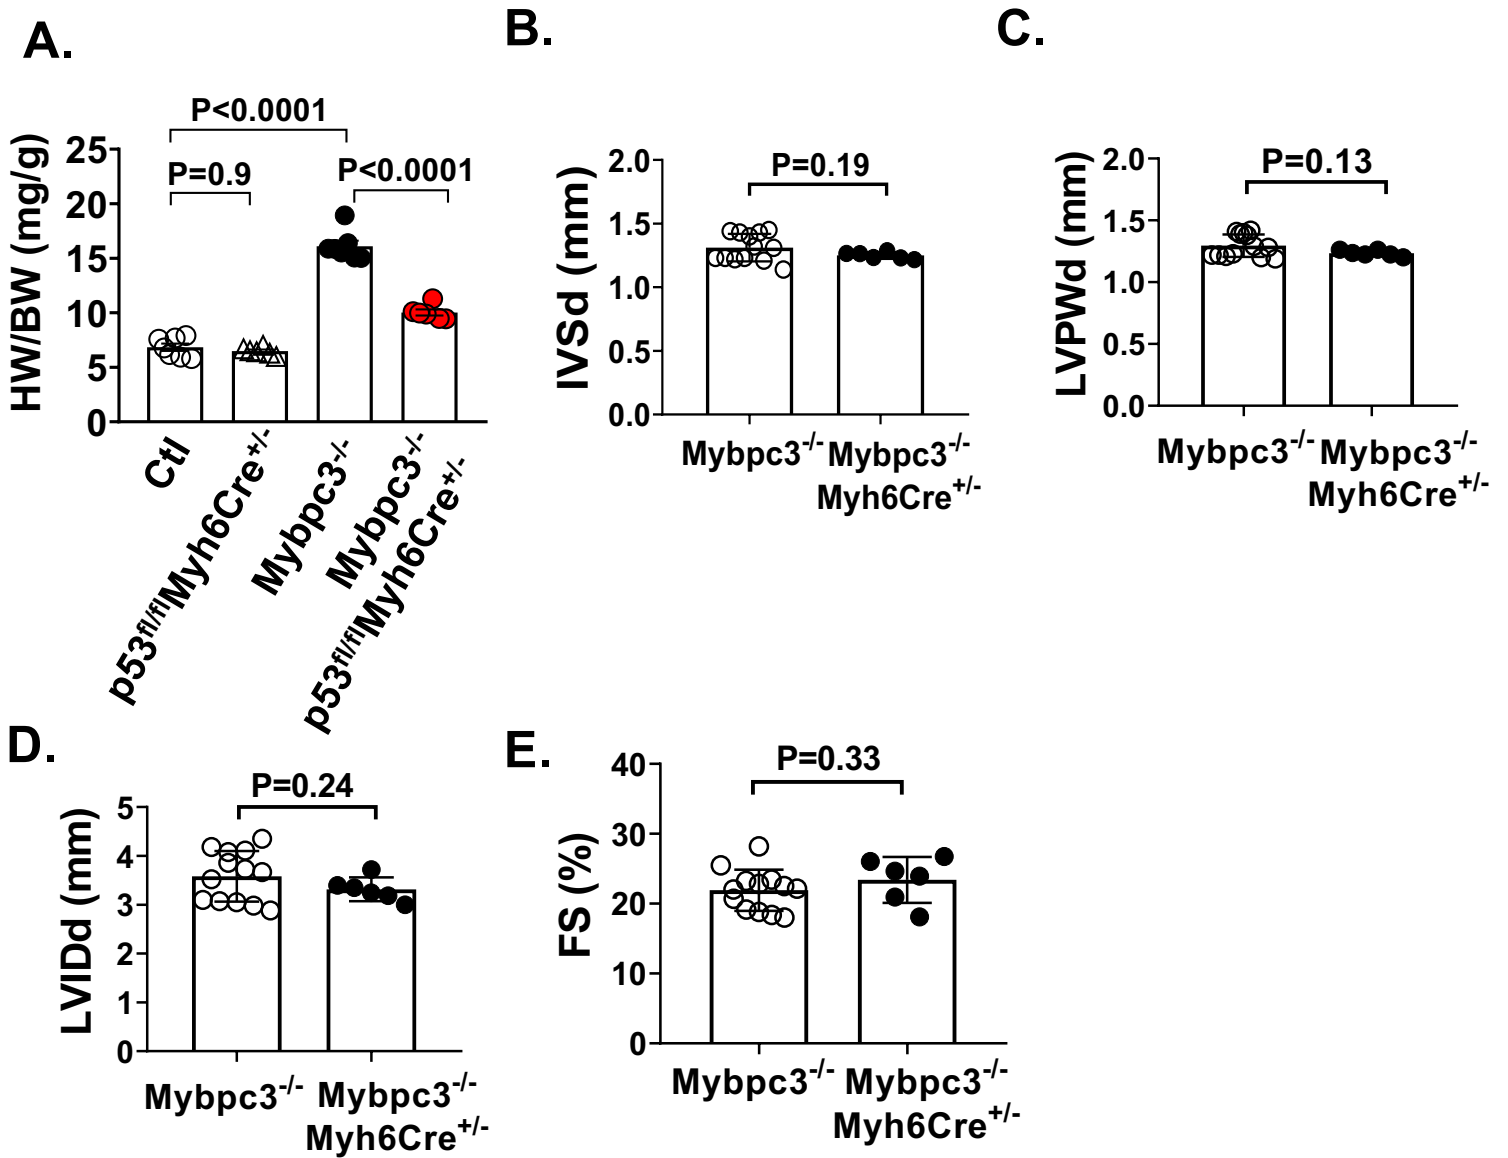

(A) Heart weight to body weight ratio (HW/BW) of control (Ctl) (n=7), *p53<sup>fl/fl</sup>Myh6Cre<sup>+/-</sup>* (n=6), *Mybpc3<sup>-/-</sup>* (n=7), and *Mybpc3<sup>-/-</sup>/*p53<sup>fl/fl</sup>Myh6Cre<sup>+/-</sup>** (n=6) mice at postnatal day 25 (P25). M-mode echocardiography assessment of (B) interventricular septal thickness at end diastole (IVSd), (C) left ventricular posterior wall thickness at end diastole (LVPWd), (D) left ventricular internal diameter at end diastole (LVIDd), and (E) fractional shortening (FS) in *Mybpc3<sup>-/-</sup>* (n=13) and *Mybpc3<sup>-/-</sup>/*Myh6Cre<sup>+/-</sup>** (n=6) mice at P25. Results are shown as mean±SEM.

Figure S4. DNA damage response in TNNT2 mice and human HCM.

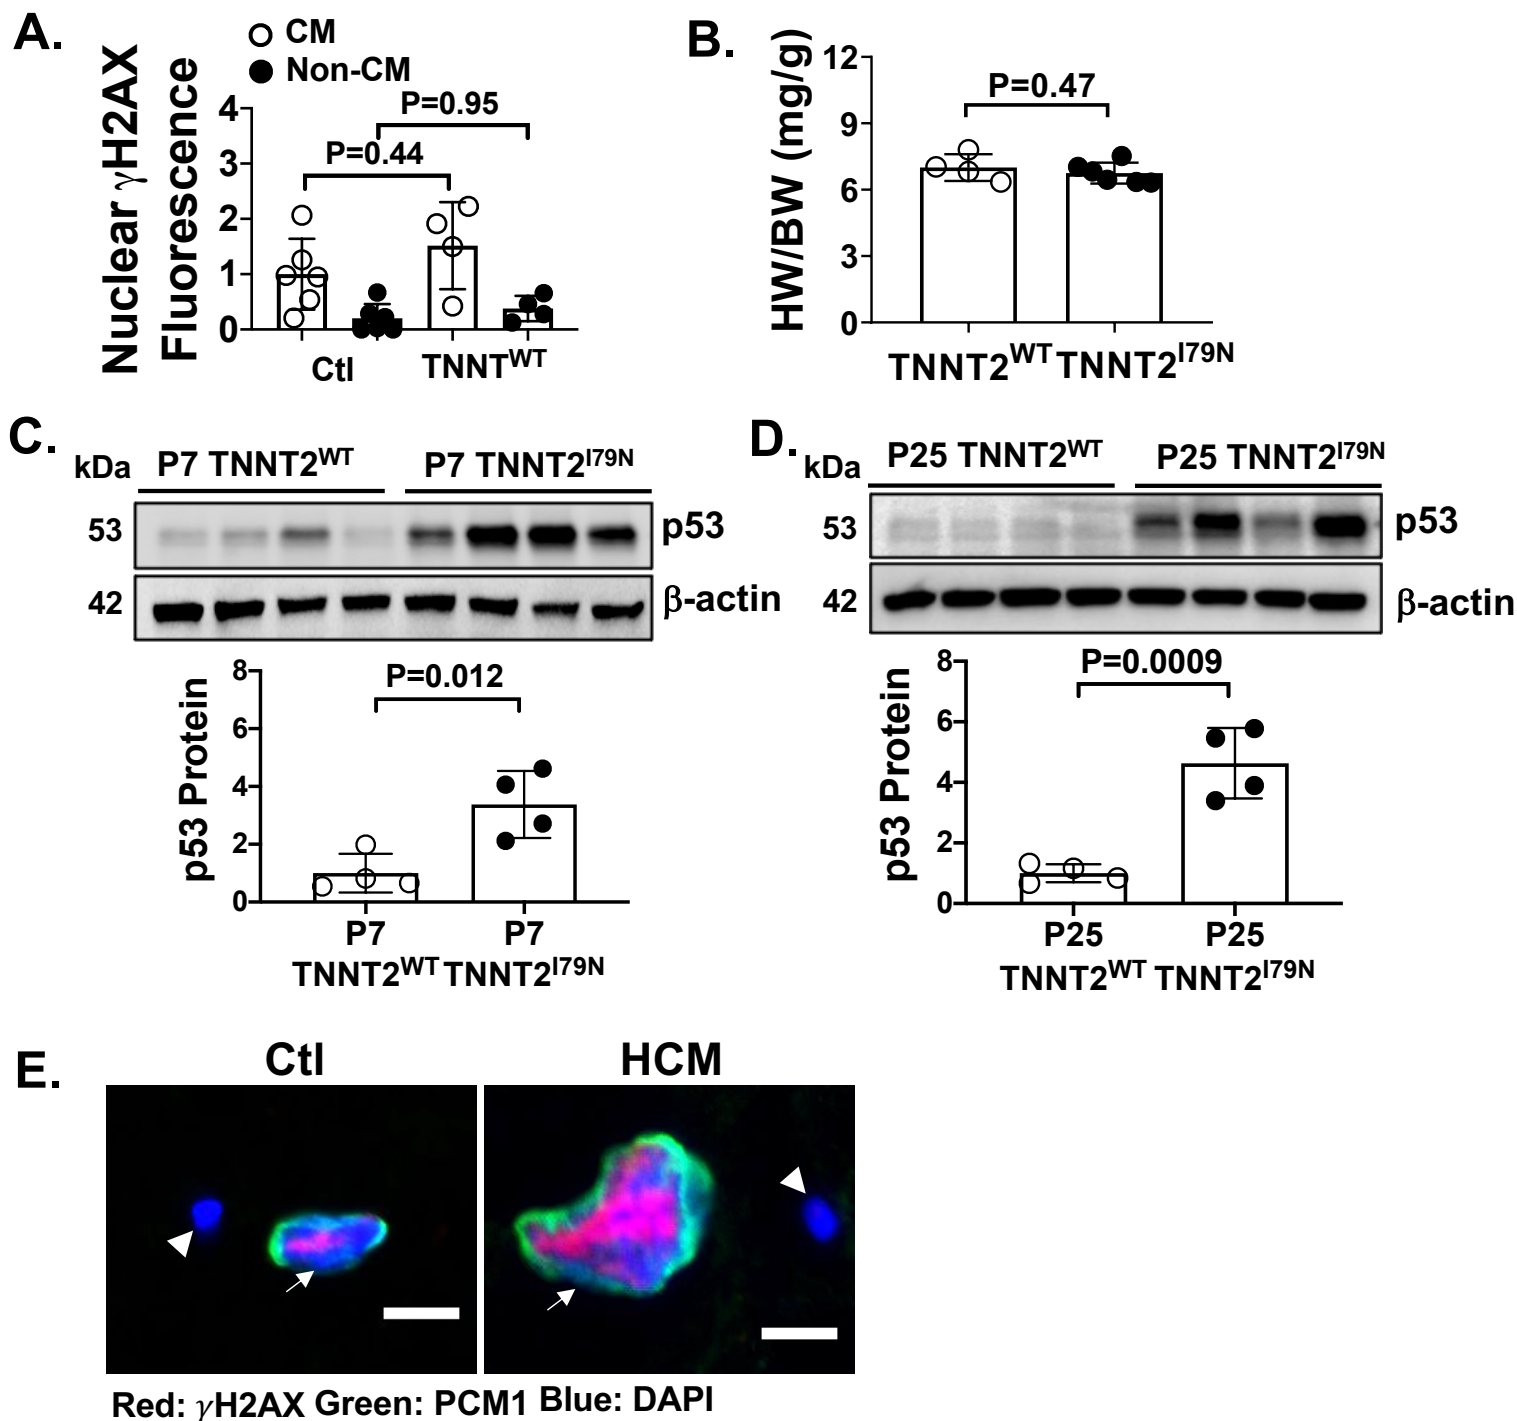

(A) Quantification of  $\gamma$ H2AX fluorescence in cardiomyocyte (CM) and non-cardiomyocyte (Non-CM) nuclei in control (Ctl) (n=6) and TNNT2<sup>WT</sup> (n=4) myocardial tissue at postnatal day 7. Minimum 50 nuclei/sample. (B) Heart weight to body weight ratio (HW/BW) of TNNT2<sup>WT</sup> (n=4) and TNNT2<sup>I79N</sup> (n=6) mice at postnatal day 7. (C) Western blot of p53 in TNNT2<sup>WT</sup> and TNNT2<sup>I79N</sup> myocardial tissue at P7 (top). Relative quantification p53 in P7 TNNT2<sup>WT</sup> (n=4) and TNNT2<sup>I79N</sup> (n=4) myocardial tissue normalized to  $\beta$ -actin (bottom). (D) Western blot of p53 in TNNT2<sup>WT</sup> and TNNT2<sup>I79N</sup> myocardial tissue at P25 (top). Relative quantification p53 in P25 TNNT2<sup>WT</sup> (n=4) and TNNT2<sup>I79N</sup> (n=4) myocardial tissue normalized to  $\beta$ -actin (bottom). All results are shown as mean $\pm$ SEM. (E) Representative immunofluorescence of  $\gamma$ H2AX (red) in explanted non-HCM control (Ctl) or hypertrophic cardiomyopathy (HCM) patient LV septal tissue. CM nuclei (arrow) were differentiated from non-cardiomyocyte nuclei (arrowhead) using PCM1 (green) staining. Nuclei labeled with DAPI (blue). Scale bars, 10  $\mu$ m.

**Figure S5. Comparison of nuclear aneuploidy between cardiomyocytes and non-cardiomyocytes in Mybpc3 null mice.**

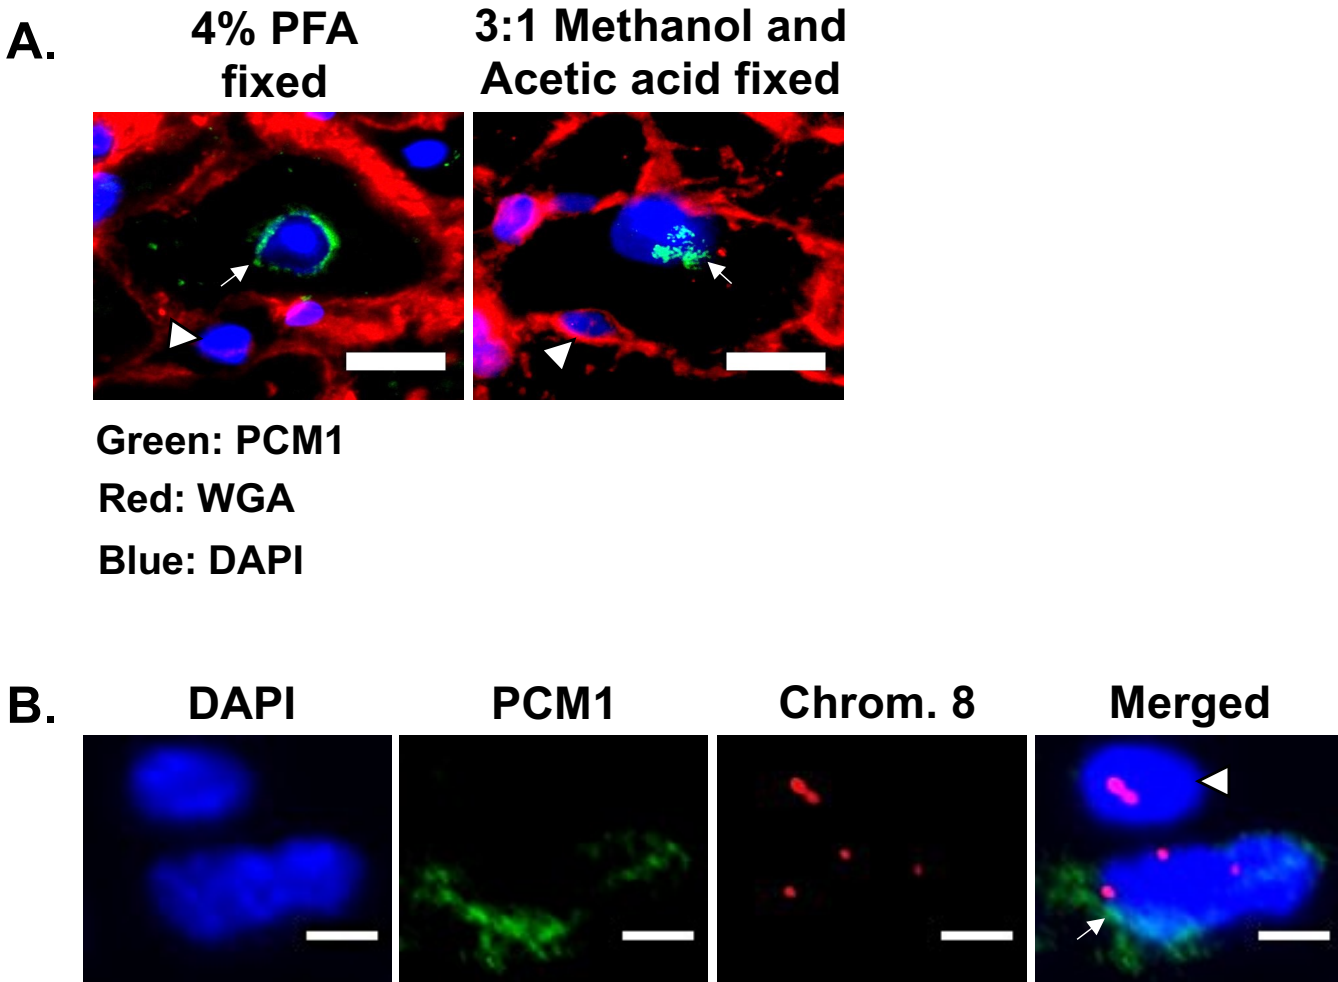

**(A)** Representative immunofluorescence image of PCM1 staining (green) in Mybpc3<sup>-/-</sup> myocardial tissue either fixed with 4 % paraformaldehyde (4% PFA, used for  $\gamma$ H2AX staining) or 3:1 methanol and acetic acid (used for chromosome FISH assay). Arrow and arrowhead represent cardiomyocyte and non-cardiomyocyte nuclei respectively. Cardiomyocyte area was marked with wheat-gram agglutinin (WGA, Red) staining. Nuclei labeled with DAPI (blue). Scale bars, 10  $\mu$ m.

**(B)** Representative immunofluorescence image of FISH assay with chromosome 8 centromeric probe (Chrom. 8) (red) from Mybpc3<sup>-/-</sup> myocardial tissue at postnatal day 25. Cardiomyocyte nuclei (arrow) were differentiated from non-cardiomyocyte nuclei (arrowhead) using PCM1 (pericentriolar material 1) (green) staining. Nuclei labeled with DAPI (blue). Scale bars, 5  $\mu$ m.
